# Supplementary material
Source: Springer Nature journal article supplement (https://www.springermedizin.de/resource/supplementary/13075_2009_2735_MOESM5_ESM.pdf/9692770)

**(a)****blood**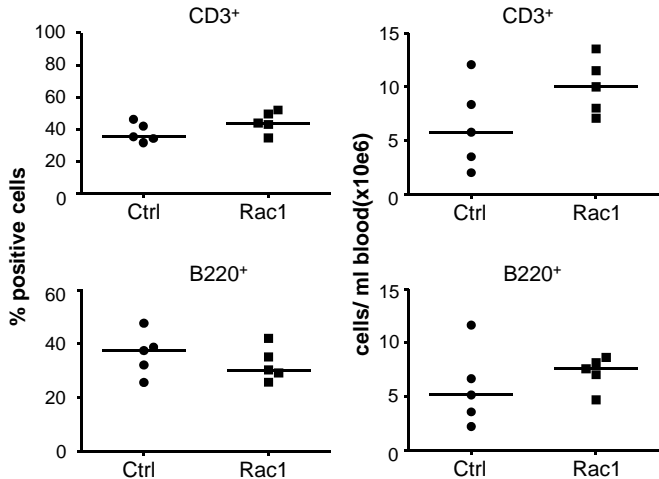**(b)****spleen**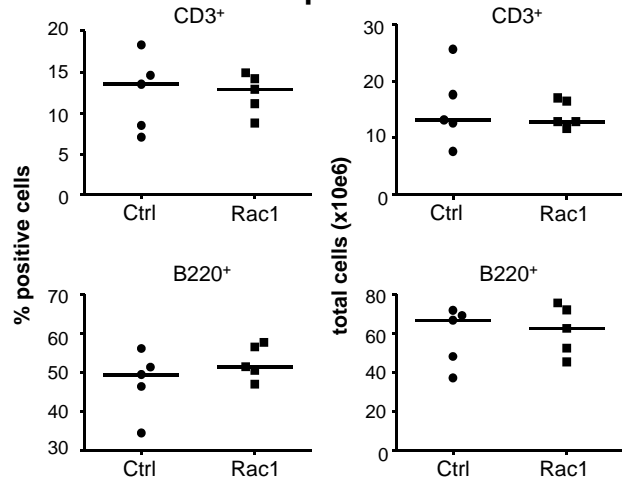

Supplement: MOESM5 [file 9692770]
